# Supplementary material
Source: publisher site journal article supplement (https://www.dovepress.com/article/501067)
Supplement: Supplementary file 1 [file get_supplementary_file.php]

# Supplementary appendix

**For Manuscript:**

**"Exploring the Spread and Impact of Health-Related Misinformation During the COVID-19 Pandemic on Chinese and English Social Media: A Comparative Bibliometric Study"**

Contents

[Supplementary appendix 1](#_Toc31800)

[1 Inclusion and Exclusion Criteria 1](#_Toc2168)

[2 Summary of Tables 2](#_Toc8910)

# 1 Inclusion and Exclusion Criteria

Inclusion Criteria:

1.Include the articles exploring the period of the COVID-19 pandemic;

2.Include the articles related to misinformation, disinformation, fake news, rumor or misinformation of any kind;

3.The misinformation involved in the included articles must be disseminated through online social media;

4.Incorporate articles must relate to health, medicine, disease, treatment or public health;

5.Include model and empirical analysis of the distribution, spread, or impact of misinformation.

Exclusion Criteria:

1.Exclude summaries, reviews, letters, errata and comments;

2.Exclude the articles whose period was not during the COVID-19 pandemic;

3.Exclude the articles with incomplete information and full text is not available;

4.Exclude the articles in which misinformation was not the main object of study;

5.Exclude the articles whose main research content is not information dissemination;

6.Exclude the articles whose information dissemination channel is not social media;

7.Articles not related to health, medicine or public health were excluded.

# 2 Summary of Tables

**Appendix Table 1. Specific search terms and search results of different literature databases.**

| Search database | Search formula | Search result |
| --- | --- | --- |
| Web of Science Core Collection | TS=(COVID-19 OR "2019-nCoV infection" OR "2019-nCoV disease" OR "corona virus disease 2019" OR SARS-CoV-2) AND TS=(misinformation OR "fake news" OR disinformation OR rumo* OR false OR mislead* OR "conspiracy news" OR error OR wrong OR incorrect OR bad OR infodemic OR infodemiology) AND TS=(health OR medical OR hospital OR disease OR prevention OR treatment OR diagnosis OR forecast OR prognosis OR infectious OR virus OR vaccin*) AND TS=(online OR internet OR web OR social OR media OR news OR advertise OR blog OR twitter OR facebook OR google OR sina OR weibo OR weixin OR tieba OR "little red book" OR bilibili OR douban OR kuaishou OR qq OR zhihu OR "you tube" OR instagram OR tumblr OR linkedin OR "tiktok" OR line) AND TS=(spread OR propagate* OR disseminat* OR circulat* OR communicat* OR diffuse OR broadcast) | 1809 |
| Scopus | TITLE-ABS-KEY ( ( covid-19 OR "2019-nCoV infection" OR "2019-nCoV disease" OR "corona virus disease 2019" OR sars-cov-2 ) AND ( misinformation OR "fake news" OR disinformation OR rumo* OR false OR mislead* OR "conspiracy news" OR error OR wrong OR incorrect OR bad OR infodemic OR infodemiology ) AND ( health OR medical OR hospital OR disease OR prevention OR treatment OR diagnosis OR forecast OR prognosis OR infectious OR virus OR vaccin* ) AND ( online OR internet OR web OR social OR media OR news OR advertise OR blog OR twitter OR facebook OR google OR sina OR weibo OR weixin OR tieba OR "little red book" OR bilibili OR douban OR kuaishou OR qq OR zhihu OR "you tube" OR instagram OR tumblr OR linkedin OR "tiktok" OR line) AND ( spread OR propagate* OR disseminat* OR circulat* OR communicat* OR diffuse OR broadcast ) ) | 1564 |
| Pubmed | (COVID-19[Title/Abstract] OR "2019-nCoV infection"[Title/Abstract] OR "2019-nCoV disease"[Title/Abstract] OR "corona virus disease 2019"[Title/Abstract] OR SARS-CoV-2[Title/Abstract]) AND (misinformation[Title/Abstract] OR "fake news"[Title/Abstract] OR disinformation[Title/Abstract] OR rumo*[Title/Abstract] OR false[Title/Abstract] OR mislead*[Title/Abstract] OR "conspiracy news"[Title/Abstract] OR error[Title/Abstract] OR wrong[Title/Abstract] OR incorrect[Title/Abstract] OR bad[Title/Abstract] OR infodemic[Title/Abstract] OR infodemiology[Title/Abstract]) AND (health[Title/Abstract] OR medical[Title/Abstract] OR hospital[Title/Abstract] OR disease[Title/Abstract] OR prevention[Title/Abstract] OR treatment[Title/Abstract] OR diagnosis[Title/Abstract] OR forecast[Title/Abstract] OR prognosis[Title/Abstract] OR infectious[Title/Abstract] OR virus[Title/Abstract] OR vaccin*[Title/Abstract]) AND (online[Title/Abstract] OR internet[Title/Abstract] OR web[Title/Abstract] OR social[Title/Abstract] OR media[Title/Abstract] OR news[Title/Abstract] OR advertise[Title/Abstract] OR blog[Title/Abstract] OR twitter[Title/Abstract] OR facebook[Title/Abstract] OR google[Title/Abstract] OR sina[Title/Abstract] OR weibo[Title/Abstract] OR weixin[Title/Abstract] OR tieba[Title/Abstract] OR "little red book"[Title/Abstract] OR bilibili[Title/Abstract] OR douban[Title/Abstract] OR kuaishou[Title/Abstract] OR qq[Title/Abstract] OR zhihu[Title/Abstract] OR "you tube"[Title/Abstract] OR instagram[Title/Abstract] OR tumblr[Title/Abstract] OR linkedin[Title/Abstract] OR "tiktok"[Title/Abstract] OR line[Title/Abstract]) AND (spread[Title/Abstract] OR propagate*[Title/Abstract] OR disseminat*[Title/Abstract] OR circulat*[Title/Abstract] OR communicat*[Title/Abstract] OR diffuse[Title/Abstract] OR broadcast[Title/Abstract]) | 937 |
| Embase | ('covid 19':ti,ab,kw OR '2019-ncov infection':ti,ab,kw OR '2019-ncov disease':ti,ab,kw OR 'corona virus disease 2019':ti,ab,kw OR 'sars cov 2':ti,ab,kw) AND (misinformation:ti,ab,kw OR 'fake news':ti,ab,kw OR disinformation:ti,ab,kw OR rumo*:ti,ab,kw OR false:ti,ab,kw OR mislead*:ti,ab,kw OR 'conspiracy news':ti,ab,kw OR error:ti,ab,kw OR wrong:ti,ab,kw OR incorrect:ti,ab,kw OR bad:ti,ab,kw OR infodemic:ti,ab,kw OR infodemiology:ti,ab,kw) AND (health:ti,ab,kw OR medical:ti,ab,kw OR hospital:ti,ab,kw OR disease:ti,ab,kw OR prevention:ti,ab,kw OR treatment:ti,ab,kw OR diagnosis:ti,ab,kw OR forecast:ti,ab,kw OR prognosis:ti,ab,kw OR infectious:ti,ab,kw OR virus:ti,ab,kw OR vaccin*:ti,ab,kw) AND (online:ti,ab,kw OR internet:ti,ab,kw OR web:ti,ab,kw OR social:ti,ab,kw OR media:ti,ab,kw OR news:ti,ab,kw OR advertise:ti,ab,kw OR blog:ti,ab,kw OR twitter:ti,ab,kw OR facebook:ti,ab,kw OR google:ti,ab,kw OR sina:ti,ab,kw OR weibo:ti,ab,kw OR weixin:ti,ab,kw OR tieba:ti,ab,kw OR "little red book":ti,ab,kw OR bilibili:ti,ab,kw OR douban:ti,ab,kw OR kuaishou:ti,ab,kw OR qq:ti,ab,kw OR zhihu:ti,ab,kw OR "you tube":ti,ab,kw OR instagram:ti,ab,kw OR tumblr:ti,ab,kw OR linkedin:ti,ab,kw OR "tiktok":ti,ab,kw OR line:ti,ab,kw) AND (spread:ti,ab,kw OR propagate*:ti,ab,kw OR disseminat*:ti,ab,kw OR circulat*:ti,ab,kw OR communicat*:ti,ab,kw OR diffuse:ti,ab,kw OR broadcast:ti,ab,kw) | 747 |
| Cochrane | (COVID-19 OR "2019-nCoV infection" OR "2019-nCoV disease" OR "corona virus disease 2019" OR SARS-CoV-2) AND (misinformation OR "fake news" OR disinformation OR rumo* OR false OR mislead* OR "conspiracy news" OR error OR wrong OR incorrect OR bad OR infodemic OR infodemiology) AND (health OR medical OR hospital OR disease OR prevention OR treatment OR diagnosis OR forecast OR prognosis OR infectious OR virus OR vaccin*) AND (online OR internet OR web OR social OR media OR news OR advertise OR blog OR twitter OR facebook OR google OR sina OR weibo OR weixin OR tieba OR "little red book" OR bilibili OR douban OR kuaishou OR qq OR zhihu OR "you tube" OR instagram OR tumblr OR linkedin OR "tiktok" OR line) AND (spread OR propagate* OR disseminat* OR circulat* OR communicat* OR diffuse OR broadcast) in Title Abstract Keyword | 64 |
| IEEE | (COVID-19 OR "2019-nCoV infection" OR "2019-nCoV disease" OR "corona virus disease 2019" OR SARS-CoV-2) AND (misinformation OR "fake news" OR disinformation OR rumo* OR false OR mislead* OR "conspiracy news" OR error OR wrong OR incorrect OR bad OR infodemic OR infodemiology) AND (health OR medical OR hospital OR disease OR prevention OR treatment OR diagnosis OR forecast OR prognosis OR infectious OR virus OR vaccin*) AND (online OR internet OR web OR social OR media OR news OR advertise OR blog OR twitter OR facebook OR google OR sina OR weibo OR weixin OR tieba OR "little red book" OR bilibili OR douban OR kuaishou OR qq OR zhihu OR "you tube" OR instagram OR tumblr OR linkedin OR "tiktok" OR line) AND (spread OR propagate* OR disseminat* OR circulat* OR communicat* OR diffuse OR broadcast) | 268 |
| PsycINFO | (COVID-19 OR "2019-nCoV infection" OR "2019-nCoV disease" OR "corona virus disease 2019" OR SARS-CoV-2) AND (misinformation OR "fake news" OR disinformation OR rumo* OR false OR mislead* OR "conspiracy news" OR error OR wrong OR incorrect OR bad OR infodemic OR infodemiology) AND (health OR medical OR hospital OR disease OR prevention OR treatment OR diagnosis OR forecast OR prognosis OR infectious OR virus OR vaccin*) AND (online OR internet OR web OR social OR media OR news OR advertise OR blog OR twitter OR facebook OR google OR sina OR weibo OR weixin OR tieba OR "little red book" OR bilibili OR douban OR kuaishou OR qq OR zhihu OR "you tube" OR instagram OR tumblr OR linkedin OR "tiktok" OR line) AND (spread OR propagate* OR disseminat* OR circulat* OR communicat* OR diffuse OR broadcast) | 315 |
| CNKI | (SU='新冠疫情' OR SU='新冠大流行' OR SU='新冠肺炎' OR SU='新型肺炎' OR SU='新冠病毒' OR SU='新型冠状病毒' OR SU='疫情防控' OR SU='新冠') AND (SU='错误信息' OR SU='虚假信息' OR SU='谣言' OR SU='不实信息' OR SU='虚假新闻' OR SU='假新闻' OR SU='假消息' OR SU='阴谋论' OR SU='辟谣' OR SU='舆情' OR SU='舆论' OR SU='信息疫情' OR SU='信息流行病学') AND (SU='社交媒体' OR SU='网络' OR SU='在线' OR SU='微博' OR SU='微信' OR SU='新浪' OR SU='博客' OR SU='抖音' OR SU='贴吧' OR SU='小红书' OR SU='哔哩哔哩' OR SU='豆瓣' OR SU='快手' OR SU='QQ' OR SU='知乎') AND (SU='传播') AND (SU='健康' OR SU='医疗' OR SU='疾病' OR SU='预防' OR SU='诊断' OR SU='治疗' OR SU='药物') | 255 |
| Wanfang | 主题:('新冠疫情' or '新冠大流行' or '新冠肺炎' or '新型肺炎' or '新冠病毒' or '新型冠状病毒' or '疫情防控' or '新冠') and 主题:('错误信息' or '虚假信息' or '谣言' or '不实信息' or '虚假新闻' or '假新闻' or '假消息' or '阴谋论' or '辟谣' or '舆情' or '舆论' or '信息疫情' or '信息流行病学') and 主题:('社交媒体' or '网络' or '在线' or '微博' or '微信' or '新浪' or '博客' or '抖音' or '贴吧' or '小红书' or '哔哩哔哩' or '豆瓣' or '快手' or 'QQ' or '知乎') and 主题:('传播') and 主题:('健康' or '医疗' or '疾病' or '预防' or '诊断' or '治疗' or '药物') | 12 |
| VIP | M=('新冠疫情' OR '新冠大流行' OR '新冠肺炎' OR '新型肺炎' OR '新冠病毒' OR '新型冠状病毒' OR '疫情防控' OR '新冠') AND M=('错误信息' OR '虚假信息' OR '谣言' OR '不实信息' OR '虚假新闻' OR '假新闻' OR '假消息' OR '阴谋论' OR '辟谣' OR '舆情' OR '舆论' OR '信息疫情' OR '信息流行病学') AND M=('社交媒体' OR '网络' OR '在线' OR '微博' OR '微信' OR '新浪' OR '博客' OR '抖音' OR '贴吧' OR '小红书' OR '哔哩哔哩' OR '豆瓣' OR '快手' OR 'QQ' OR '知乎') AND M=('传播') AND M=('健康' OR '医疗' OR '疾病' OR '预防' OR '诊断' OR '治疗' OR '药物') | 0 |
| Summary |  | 5971 |

**Appendix Table 2. Core journals articles, citations, JCR categories and impact factor.**

| Rank | Sources | Articles | Citations | JCR categories | JCR partition | 2021 JIF |
| --- | --- | --- | --- | --- | --- | --- |
| 1 | Journal of Medical Internet Research | 64 | 2106 | Medical Informatics | Q1 | 7.077 |
| 2 | International Journal of Environmental Research and Public Health | 54 | 1112 | Public, Environmental & Occupational Health | Q1 | 4.614 |
| 3 | Plos One | 30 | 599 | Multidisciplinary Sciences | Q2 | 3.752 |
| 4 | JMIR Infodemiology | 22 | 38 | Null | Null | Null |
| 5 | Frontiers in Public Health | 15 | 193 | Public, Environmental & Occupational Health | Q1 | 6.461 |
| 6 | JMIR Public Health and Surveillance | 14 | 321 | Public, Environmental & Occupational Health | Q1 | 14.557 |
| 7 | Human Vaccines & Immunotherapeutics | 13 | 514 | Biotechnology & Applied Microbiology | Q2 | 4.526 |
| 8 | Journal of News | 13 | 31 | Null | Null | Null |
| 9 | Vaccines | 12 | 501 | Medicine, Research & Experimental | Q2 | 4.961 |
| 10 | Bmj Open | 12 | 74 | Medicine, General & Internal | Q2 | 3.007 |
| 11 | Frontiers in Psychology | 11 | 380 | Psychology, Multidisciplinary | Q1 | 4.232 |
| 12 | Health Communication | 11 | 157 | Health Policy & Services | Q2 | 3.501 |
| 13 | Computers in Human Behavior | 11 | 58 | Psychology, Experimental | Q1 | 8.957 |
| 14 | BMC Public Health | 9 | 131 | Public, Environmental & Occupational Health | Q2 | 4.135 |
| 15 | Journalism Communication | 9 | 22 | Null | Null | Null |
| 16 | Scientific Reports | 7 | 481 | Multidisciplinary Sciences | Q2 | 4.997 |
| 17 | Big Data & Society | 7 | 152 | Social Sciences, Interdisciplinary | Q1 | 8.731 |
| 18 | Youth Journalist | 7 | 41 | Null | Null | Null |
| 19 | Social Media + Society | 6 | 85 | Communication | Q1 | 4.636 |
| 20 | Healthcare | 6 | 48 | Health Care Sciences & Services | Q2 | 3.16 |
| 21 | JMIR Medical Informatics | 6 | 26 | Medical Informatics | Q3 | 3.228 |
| 22 | JMIR Formative Research | 6 | 13 | Null | Null | Null |

**Appendix Table 3. Institutions with no less than 10 funds.**

| Rank | Institution name | Number of funds |
| --- | --- | --- |
| 1 | National Natural Science Foundation of the People's Republic of China | 50 |
| 2 | National Social Science Foundation of the People's Republic of China | 48 |
| 3 | USA National Institutes of Health | 39 |
| 4 | National Science Foundation, United States | 38 |
| 5 | Ministry of Education of the People's Republic of China | 32 |
| 6 | European Union | 21 |
| 7 | Ministry of Science and Technology of the People´s Republic of China | 15 |
| 8 | Canadian Institutes of Health Research | 11 |
| 9 | City University of Hong Kong | 10 |
